# Supplementary material
Source: PubMed Central journal article supplement (PMC5885181)
Supplement: jamaneurol-75-444-s001.pdf [file jamaneurol-75-444-s001.pdf]

## Table of Contents

|    | Page                                       |
|----|--------------------------------------------|
| 49 |                                            |
| 50 |                                            |
| 51 |                                            |
| 52 | <b>1. Introduction.....3</b>               |
| 53 |                                            |
| 54 |                                            |
| 55 | <b>2. Aims and Objectives.....7</b>        |
| 56 |                                            |
| 57 |                                            |
| 58 | <b>3. Outcomes.....7</b>                   |
| 59 |                                            |
| 60 |                                            |
| 61 | <b>4. Study Design.....8</b>               |
| 62 |                                            |
| 63 |                                            |
| 64 | <b>4.1 Study Population.....8</b>          |
| 65 |                                            |
| 66 |                                            |
| 67 | <b>4.2 Experimental Design.....8</b>       |
| 68 |                                            |
| 69 |                                            |
| 70 | <b>4.3 Study Supplements.....10</b>        |
| 71 |                                            |
| 72 |                                            |
| 73 | <b>4.4 Sample Size Calculation.....10</b>  |
| 74 |                                            |
| 75 |                                            |
| 76 | <b>4.5 Measurements.....12</b>             |
| 77 |                                            |
| 78 | <b>4.6 Statistical analysis.....</b>       |
| 79 |                                            |
| 80 |                                            |
| 81 | <b>5. Gantt chart.....14</b>               |
| 82 |                                            |
| 83 |                                            |
| 84 | <b>6. Significance of the Study.....14</b> |
| 85 |                                            |
| 86 |                                            |
| 87 | <b>7. Financial Support.....15</b>         |
| 88 |                                            |
| 89 |                                            |
| 90 | <b>8. References.....15</b>                |
| 91 |                                            |

92 **1. Introduction:**

93

94 Diabetes Mellitus is a complex metabolic disease that can have devastating effects  
95 on multiple organs in the body. It has become a major public health problem affecting an  
96 increasing number of individuals worldwide. Diabetes is the leading cause of nephropathy,  
97 retinopathy, neuropathy and cardiovascular diseases. The characteristic clinical signs and  
98 symptoms of these complications are well established (American Diabetes Association,  
99 2002; American Diabetes Association, 2008). The development of these complications is  
100 dependent on the duration of diabetes and the level of metabolic control including glucose  
101 level, hyperlipidemia, and other related parameters. Since both randomized trials and large  
102 cohort studies have shown that good control of blood glucose levels is associated with  
103 reduced risk of these complications (Gaede et al.,2003; Reichard and Rosenqvist, 1989;  
104 The DCCT Research Group, 1993), current treatment is aimed at obtaining and  
105 maintaining normal glucose levels.

106 Neuropathy affects approximately 30–50% of all diabetic patients and is the  
107 commonest form of neuropathy in the developed world. It encompasses several  
108 neuropathic syndromes including focal and symmetrical neuropathies. By far, the  
109 commonest of which is distal symmetrical neuropathy. The two main clinical  
110 consequences, foot ulcerations sometimes leading to amputation and pain neuropathy,  
111 are associated with much patient morbidity and mortality. There is now little doubt that  
112 glycaemic control and duration of diabetes are major determinants of distal symmetrical  
113 neuropathy. In addition, potentially modifiable, traditional markers of macrovascular  
114 disease such as hypertension, hyperlipidemia and smoking are also independent risk  
115 factors (Tesfaye, 2007).

116 There is now increasing evidence that the cause of distal symmetrical neuropathy  
117 may be nerve ischemia, though metabolic factors may be important early. Pain is the most  
118 distressing symptom of neuropathy and the main factor that prompts the patient to seek  
119 medical advice (Tesfaye, 2007). About 16-26% of diabetes patients experience chronic  
120 neuropathic pain (Jensen et al, 2006).

121 Abnormalities of autonomic function are very common in subjects with longstanding  
122 diabetes; however, clinically significant autonomic dysfunction is uncommon. Several  
123 organ systems including the cardiovascular, gastrointestinal and genitor-urinary systems  
124 may be affected (Tesfaye, 2007).

125 Oxidative stress is involved in the pathophysiology of diabetes mellitus and has a  
126 major role in the development of diabetic complications. This occur either because of free  
127 radical overproduction (by auto-oxidation of glucose and glycated protein) or by  
128 antioxidants level reduction (Young et al, 1992). The presence of free radical has an  
129 important role in nerve tissue damage that leads to diabetic neuropathy (Tutuncu at  
130 al,1998).

131 Electrophysiological studies have a major role in the measurement, detection, and  
132 characterization of peripheral neuropathy associated with diabetes (standardized  
133 measures in diabetic neuropathy (American Diabetes Association Consensus Statement,  
134 1992)).

135 Vitamin E can be prescribed to patients with diabetes to prevent any oxidative  
136 damage (Srivastan et al, 2009). Vitamin E is a powerful antioxidant that reduces levels of  
137 free radicals and oxidative stress.

138 An animal study have found that vitamins C and E treatment can lower  
139 malondialdehyde levels and increase the antioxidant levels to near control values. The  
140 results verify the presence of oxidative stress in diabetes and suggest beneficial effects of  
141 vitamins C and E combinations in combating the oxidative stress among diabetic rats  
142 (Aksoy et al, 2005).

143 Another animal study revealed that treating rats with  $\alpha$ -tocopherol and tocotrienol for  
144 10 weeks significantly improved and ameliorate all the biochemical and behavioral  
145 outcomes of alcohol-induced neuropathy in a dose-dependent manner with more potent  
146 effects observed with tocotrienols. The study demonstrates the effectiveness of  
147 tocotrienols in attenuation of alcoholic neuropathy (Tiwari et al, 2009).

148 In a placebo-controlled, double-blind, randomized study of 21 patients with type 2  
149 diabetes, large doses of vitamin E were studied for their ability to reduce neuropathy.  
150 During the six-month study, patients were either given placebo or 900 mg vitamin E, then  
151 measured for nerve conduction and function. The researchers found that mild to moderate  
152 defective nerve conduction was improved with high-dose vitamin E, which suggested that  
153 patients with neuropathy might experience a reduction in symptoms with vitamin E  
154 treatment (Tutuncu et al, 1998).

155 Cognitive dysfunction is a less addressed and not as well recognized complication  
156 of diabetes. Patients with type 1 and type 2 diabetes mellitus have been found to have  
157 cognitive deficits that can be attributed to their disease. Both hypoglycemia and  
158 hyperglycemia have been considered as causes of cognitive dysfunction, and frequent  
159 recurrence of hypoglycemia will impair memory over time. Both old age and diabetes are  
160 independently associated with an increased risk of cognitive dysfunction; the risk is even  
161 greater for older adults with diabetes (Allen et al, 2004). Cognitive Function is the term  
162 used to describe a person's state of consciousness (alertness and orientation), memory,  
163 and attention span. Cognitive functioning has been the subject of many studies in both  
164 type 1 and type 2 diabetes. Several cross-sectional and case-control studies since 1980s  
165 have shown positive associations between diabetes and cognitive impairment (Gregg and  
166 Brown, 2003). Still, several questions remained to be answered. In type 2 diabetes,  
167 neuropsychological studies have reported moderate degrees of cognitive impairment. The  
168 most common findings are that diabetes is associated with lowered performance on speed  
169 of information processing test, episodic memory test, and to lesser extent, on mental  
170 flexibility test (Stewart and Liolitsa, 1999; Awad et al, 2004). Middle-aged individuals with  
171 type 1 diabetes have also been reported to show deficits on a wide range of  
172 neuropsychological tests compared to age-matched controls, but results are even more  
173 heterogeneous than in type 2 diabetes with respect to the severity and nature of the  
174 affected cognitive domains. Some studies reported impairments on tests relying on  
175 problem-solving skills (Deary et al, 1993), whereas other studies reported deficiencies in  
176 psychomotor efficiency (Ryan et al, 1992) or memory and learning (Ryan et al, 1993;  
177 Sachon et al, 1992) or found no difference at all (Wredling et al, 1990).

178 In addition, there is also evidence on the association of diabetes with changes in

179 psychological performance. For example, it has been found that depressive symptoms are  
180 more prevalent in diabetic patients with type 1 or type 2 diabetes in comparison with age-  
181 matched controls (Anderson et al, 2001), and depressive symptoms might be attributed to  
182 cognitive dysfunction (Elderkin-Thompson et al, 2003; Lockwood et al, 2002).

183 Moreover, the structural correlates and pathophysiological mechanisms underlying  
184 these cognitive deficits are still uncertain. Kumar et al (2009) reviewed a few studies  
185 performed on type 1 and type 2 diabetic patients using magnetic resonance imaging  
186 (MRI). Subcortical white-matter and cortical and subcortical atrophy have been reported as  
187 radiological abnormalities. The limitation of majority of these studies involved small sample  
188 sizes or lacked appropriate non-diabetic controls. In type 2 diabetes, more studies have  
189 been published on MRI abnormalities, including cortical and subcortical atrophy, together  
190 with an increased occurrence of cerebral infarcts relative to controls. Moreover, white-  
191 matter lesions are more prevalent and more severe in type 2 diabetes in comparison with  
192 non-diabetic controls.

193 Atrophy may be linked to a history of severe hypoglycemic episodes, since only  
194 patients who had experienced multiple severe hypoglycemic episodes showed cortical  
195 atrophy (Perros and Frier, 1997). Focal lesions mostly involve the subcortical white- matter  
196 (Dejgaard et al, 1991; Ferguson et al, 2003a; Perros and Frier, 1997). For example, high-  
197 intensity periventricular white-matter lesions, particularly small punctuate white-matter  
198 lesions, periventricular caps, or pencil thin rims were present in one-third of the scans in a  
199 study by Ferguson and co-workers (Ferguson et al, 2003). They found these to be related  
200 to the presence of background retinopathy. It has been suggested that Vitamin E,  
201 including tocopherols and tocotrienols, can help to improve cognitive function and stall  
202 cognitive decline through its antioxidant effects. A reason for this nutrient's success at  
203 preventing oxidative damage in brain cells is its fat-soluble criteria  
204 (<http://ageing.oupjournals.org>). During the World Alzheimer's Congress held in July 2001,  
205 it was reported that high intakes of vitamin E effectively lessened memory loss and  
206 cognitive dysfunction among more than 6,000 elderly subjects who were generally taking  
207 Vitamin E between 200 to 400 IU per day (Kuhad et al, 2009).

208

## 209 **1.2 Tocotrienols**

210 The term vitamin E includes a group of plant derived lipid-soluble compounds. Their  
211 molecular structure is based on a chromanol ring with a side chain at the C2 position. In  
212 case of tocopherols, the phytol side chain is saturated. In tocotrienols the side chain is  
213 unsaturated by the presence of three double bonds. There are 8 naturally occurring  
214 isoforms: 4 tocopherols and 4 tocotrienols, which are designated  $\alpha$ -,  $\beta$ -,  $\gamma$ - and  $\delta$ -,  
215 respectively, depending on the number and position of methyl groups at the chromanol  
216 ring (Figure 1).

217

218

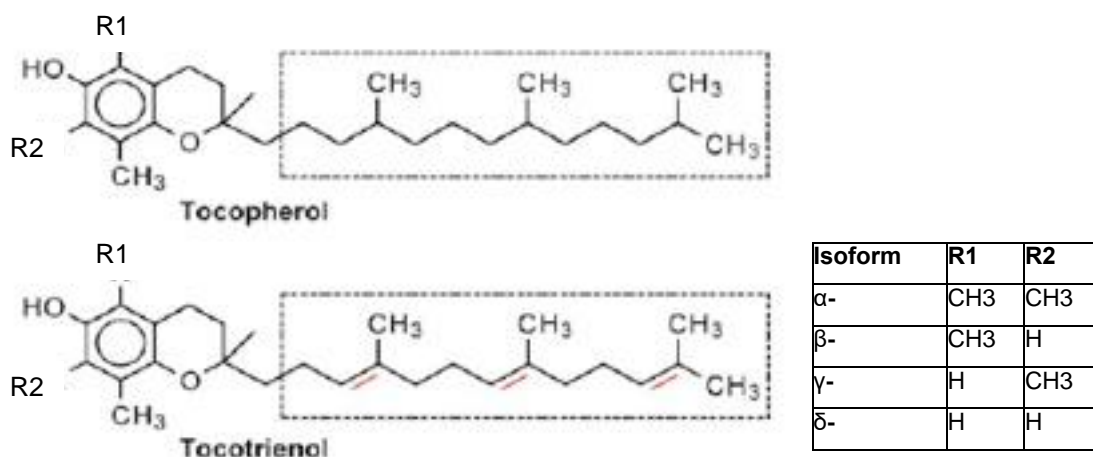

219  
220

221 *Figure 1: Chemical structures of Tocopherol and Tocotrienol. Note the three double bonds*  
 222 *in the tocotrienol side tail. The number and position of methyl groups at the chromanol ring*  
 223 *for corresponding isoforms is given in the table*  
 224

225 The unsaturated side-chain in tocotrienols makes them penetrate tissues with  
 226 saturated fatty layers more efficiently (Kuhad and Chopra, 2009).

227 Animal studies have also revealed that palm tocotrienols improved blood glucose,  
 228 dyslipidemia and oxidative stress in diabetic rats. It is able to prevent the progression of  
 229 vascular wall changes occurring in diabetes mellitus (Roper et al, 2000; Budin et al, 2009).

230 The oxygen consumption rate of the brain is high. Moreover, polyunsaturated fatty  
 231 acids are found abundantly in the neuronal cell membranes. It has been hypothesized that  
 232 cumulative free-radical damage to neurons over time contributes to cognitive decline and  
 233 neurodegenerative diseases. Therefore, ingestion of sufficient supplemental antioxidants  
 234 (such as tocotrienols) might provide some protection (Morris et al, 2002). This hypothesis  
 235 was supported by the results of a clinical trial involving 341 patients with Alzheimer's  
 236 disease of moderate severity who were randomly assigned to receive a placebo, vitamin E  
 237 (2,000 IU/day dl-alpha-tocopherol), selegiline (a monoamine oxidase inhibitor), or vitamin  
 238 E and selegiline together. After 2 years, vitamin E and selegiline, given alone or in  
 239 combination significantly delayed brain functional deterioration (Morris et al, 2002).

240 Tocotrienols, in particular α-tocotrienol have been shown to possess neuroprotective  
 241 effect independent of anti-oxidant activity (Sen et al, 2000; Khanna et al, 2005). Using cell-  
 242 based studies, Sen et al (2000) have shown that α-tocotrienol but not α-tocopherol is able  
 243 to prevent glutamate-induced neuronal cell death at nanomolar concentrations. Later  
 244 studies conducted by Khanna et al (2005) showed that α- tocotrien ol conferred protection  
 245 against glutamate and stroke-induced neurodegeneration in rats.

246 In view of the above neuroprotective property of tocotrienols, Kuhad and Chopra  
 247 (2009) have proceeded to demonstrate that tocotrienols supplementation helped to  
 248 reverse neuropathic pain in diabetic rats. It has been postulated the beneficial properties  
 249 of tocotrienols are due to their suppressive effects on the oxidative-nitrosative stress,  
 250 inflammatory cytokine release and caspase-3 which are implicated in the pathogenesis of  
 251 diabetic neuropathy.

252 In the same year, Tiwari et al (2009) have shown that tocotrienols can prevent  
 253 cognitive deficits and attenuate alcoholic peripheral neuropathy associated with selective  
 254 neuronal damage due to chronic alcohol consumption. Moreover, the beneficial effects  
 255 were found to be more pronounced with tocotrienols compared to tocopherols. It has been  
 256 postulated that the anti-oxidants property of tocotrienols, the suppression of nitrosative

257 stress and elevated cytokines levels together with acetylcholinesterase activity in the brain  
258 regions contributes significantly in preventing the chronic alcohol- induced cognitive  
259 deficits in rats.

260 Yuen and his group are currently conducting a clinical study in human subjects on  
261 neuroprotective effects of tocotrienols (NCT00753532). In the study, subjects were  
262 followed up for 2 years to determine the volume of white matter lesions on repeated MRI  
263 after treatment with tocotrienol as compared to placebo. White matter lesions are related  
264 to vascular events in the brain and represent subclinical infarcts, resulting in death/  
265 degeneration of neurons and are positively correlated to cognitive impairment. Preliminary  
266 results from an interim analysis are encouraging; patients on tocotrienols shown significant  
267 reduction in volume of white matter lesion (confidential communication).

268 Giving that the tocotrienols have been shown to possess neuroprotective effects and  
269 that both type 1 and type 2 diabetes can lead to peripheral neuropathy and cognitive  
270 impairment, the present study aims to determine the beneficial effects of tocotrienols in  
271 ameliorating such neurological related events in both type 1 and type 2 diabetic patients.  
272

## 273 **2. Aims and Objectives**

274

275

276

### **Primary objective:**

277

278

279

280

- To investigate the effects of tocotrienols on peripheral neuropathy in type 1 and type 2 diabetes mellitus.

281

282

### **Secondary objective:**

283

284

285

286

287

288

- To investigate the effects of tocotrienols on cognitive impairment in type 1 and type 2 diabetes mellitus.
- To investigate the prevalence of cognitive impairment among diabetic patients.

289

290

## **3. Outcomes**

291

292

### **Primary Outcomes**

293

294

295

296

- Total Symptoms Score (TSS) (pain, paresthesia, burning, and numbness) of patients with diabetes peripheral neuropathy.

297

298

### **Secondary outcomes**

299

300

301

302

303

304

- Neuropathy Impairment Score (NIS) of patients with diabetes type 1 and 2 neuropathy.
- Nerve Conduction Velocity (NCV) test of patients with diabetes type 1 and 2 neuropathy.
- Mini Mental State Examination (MMSE) score, Montreal Cognitive Assessment (MoCA) test.

305 **4. Study Design**

306

307 **4.1 Study Population**

308

309 **Inclusion Criteria**

- 310 - Diabetic adults ( both type 1 or 2)  $\geq 20$  years old with diabetic peripheral
- 311 neuropathy with TSS  $\geq 3$  points.
- 312 - Patients with type 1 diabetes (duration of  $\geq 5$  years).
- 313 - Patients with type 2 diabetes (at diagnosis).
- 314 - Patients with NIS  $\geq 2$

315

316 **Exclusion Criteria**

- 317 - Patients HbA1c  $> 12\%$ .
- 318 - Patients with hypoglycemia or conscious impairment at the time of test
- 319 conduction.
- 320 - Patients exhibiting symptoms of peripheral vascular disease with absence of 2
- 321 foot pulses on the same foot (Posterior tibialis, Dorsalis pedis)
- 322 - Immuno-compromised patients.
- 323 - Patients with severe visual impairment, history of psychosis; schizophrenia;
- 324 bipolar disorder; current depression or brain trauma and patients with alcohol
- 325 dependence or drug abuse such as cocaine, heroin, etc.
- 326 - Those having lesions with a propensity to bleed (e.g., bleeding peptic ulcers),
- 327 those having a history of hemorrhagic stroke and those with inherited bleeding
- 328 disorders (e.g., hemophilia) or patients on warfarin.
- 329 - Pregnancy and lactation.
- 330 - Patients with renal function test of more than 150  $\mu\text{mol/L}$  (serum creatinine).
- 331 - Patients with liver function test of more than 5 times of the upper normal range
- 332 (for AST, ALT and GGT)
- 333 - Active infection or infectious diseases.
- 334 - Other significant uncontrolled medical illnesses that may interfere with drug
- 335 administration or interpretation of results.

336

337 **4.2 Experimental Design**

338

339 In this randomized, double-blind placebo-controlled study:

340

341 1. Three hundred patients with diabetes (type 1 and type 2) with diabetic peripheral

342 neuropathy will be recruited from Seberang Jaya Hospital and 10 peripheral health

343 clinics and hospitals, in Penang and Seberang Perai area.

344

345 2. The patients will be randomised to receive mixed tocotrienols (200 mg twice per

346 day) or placebo for 12 months. Data on long term (up to 5 years) supplementation

347 with 400mg/day of mixed tocotrienols did not show any reported or observed adverse

348 effects (Nesaretnam et al, 2010; Magosso et al, 2010; and an ongoing clinical trial on

349 the neuroprotective effects of tocotrienols.

350 (<http://clinicaltrials.gov/ct2/show/NCT00753532>).

351



352 3. Patients with normal homocysteine level (less than 15  $\mu\text{mol/L}$ ) will be assigned as  
353 subgroup A. Patients who are found to have abnormally elevated homocysteine  
354 levels (equal or more than 15  $\mu\text{mol/L}$ ) will be assigned as subgroup H and they will  
355 be supplemented with Folic acid and methylcobalamin to treat the elevated  
356 homocysteine level.

357

358 4. At the screening stage, laboratory assessment for homocysteine, liver function test,  
359 kidney function test and HbA1c for each patient will be conducted.

360

361 5. At the baseline of the study (0 time), clinical assessment on clinical neuropathy,  
362 cognitive function will be assessed on the 300 patients. Other clinical laboratory tests  
363 include homocysteine level, tocotrienols level, folic acid, Vitamin B<sub>12</sub>, Vitamin B1 and  
364 fasting blood glucose.

365

366 6. If the screening evaluation (clinical assessment, laboratory tests and  
367 questionnaires) shows that patients are eligible for the study, patients will be  
368 randomly assigned as Group 1 and Group 2. They will have 50/50 chance (like  
369 flipping a coin) of being in one of either group. One group will receive tocotrienols for  
370 one year as a supplement while the other group will be receiving placebo in addition  
371 to their normal anti-diabetic medications (in a double-blinded model). However,  
372 information regarding which treatment of each patient receiving will be made  
373 available to physician in case of any emergency.

374

375 7. Plasma tocotrienols will be assessed at the baseline, 3<sup>rd</sup>, 6<sup>th</sup>, 9<sup>th</sup> and 12<sup>th</sup> months.

376

377 8. The subjects are required to return for clinical assessment at 6<sup>th</sup> and 12<sup>th</sup> months  
378 interval starting from 0 time for one year. These assessments include clinical  
379 assessment of peripheral neuropathy (TSS and NIS) and cognitive function test using  
380 Mini Mental State Examination (MMSE) and Montreal Cognitive Assessment (MoCA).  
381 Laboratory assessment including fasting blood glucose, HbA1c, Liver function test,  
382 Renal function test and Tocotrienols plasma level will be assessed on the 3<sup>rd</sup>, 6<sup>th</sup>, 9<sup>th</sup>,  
383 and 12<sup>th</sup> month. Homocysteine, Folic acid, Vitamin B12 and Vitamin B1 will be  
384 assessed on baseline, 6<sup>th</sup> and 12<sup>th</sup> month.

385

386 9. Blood sample of 10 ml volume will be collected at baseline, 3<sup>rd</sup>, 6<sup>th</sup>, 9<sup>th</sup> and 12<sup>th</sup>  
387 month for the above mentioned laboratory tests.

388

389 10. Nerve conduction test (NCT) will also be performed on consented subjects at 0  
390 time (baseline) and repeated only at 12<sup>th</sup> month (end of study) to evaluate the  
391 conduction performance of the nerve fibers. Researchers will be blinded in the  
392 treatment given.

393

394 11. MRI will be done for 40 randomly selected (20 on tocotrienols and 20 on placebo)  
395 patients with at 0 time (baseline) and repeated only at 12<sup>th</sup> month (end of study). MRI  
396 will also be done on randomly selected 20 non-diabetic individuals with no cognitive  
397 impairment as negative control at 0 time (baseline) only. The selection of volunteers  
398 will be made by the person in charge of the randomization. Researchers will be  
399 blinded in the treatment given.

400

401 12. Tocotrienol will be stored and dispensed in ready-packed bottle. Each bottle will  
402 contain 30 capsules. Tocotrienol/placebo will be given to the patients every 3 months  
403 during their visits to the research center.

404  
405  
406  
407  
408  
409  
410  
411  
412  
413  
414  
415  
416  
417  
418  
419  
420  
421  
422  
423  
424  
425  
426  
427  
428  
429  
430

13. Patients who successfully complete the initial 1-year course of the study will be invited to participate in an extended study where open label treatment will be provided for 1 year, to further observe the effect of the treatment in compliant patients, Procedures carried out during follow-up visits of the extended 1-year study will be similar to procedures in the initial study.

14. Withdrawal criteria:

Patient will be withdrawn from the study for any of the below reasons:

- Presence of adverse reactions whether it's related or not to this study.
- Patient shows poor compliance to tocotrienol/placebo. Researcher will ask patient to bring their bottle in the next visit. Researcher will count the remaining capsules to determine patient compliance.
- Patients withdraw their consent to participate in the study.

Tocovid SupraBio 200mg produced by Hovid Bhd (Ipoh, Malaysia) will be used in the study. This is the only 200 mg mixed tocotrienols product available commercially. Moreover, it is formulated with a patented delivery system that ensures consistent and enhanced oral absorption of tocotrienols. It is also used in the other studies mentioned above.

### **4.3 Study supplement**

Tocotrienols is packed as 30 capsules per bottle, stored in amber color glass bottle and away from direct sun light. Bottles are stored in below 30°C according to the storage condition recommendations of the manufacturer.

431 **4.4 Sample Size Calculation**

432

433 We calculate the sample size for this study using PS: Power and Sample Size Calculation  
434 software version 3.1.2., based on the SYDNEY 2 trial which investigated the effects of  
435 alpha-lipoic acid on diabetic peripheral neuropathy (Ziegler *et al.*, 2006). We calculate the  
436 reduction in Total Symptom Score after treatment, with a corresponding standard deviation  
437 of 3.37. In order to achieve 90% power to detect a difference between groups of 1.33  
438 points of the primary end point after 12-month of supplementation, a minimum of 136  
439 subjects in each group are required. To accommodate a dropout rate of 10%, we increase  
440 the sample size to 150 per group, for a total of 300 participants.

441

442

443

444

445

446

447

448

449

450

451

452

453

454

455

456

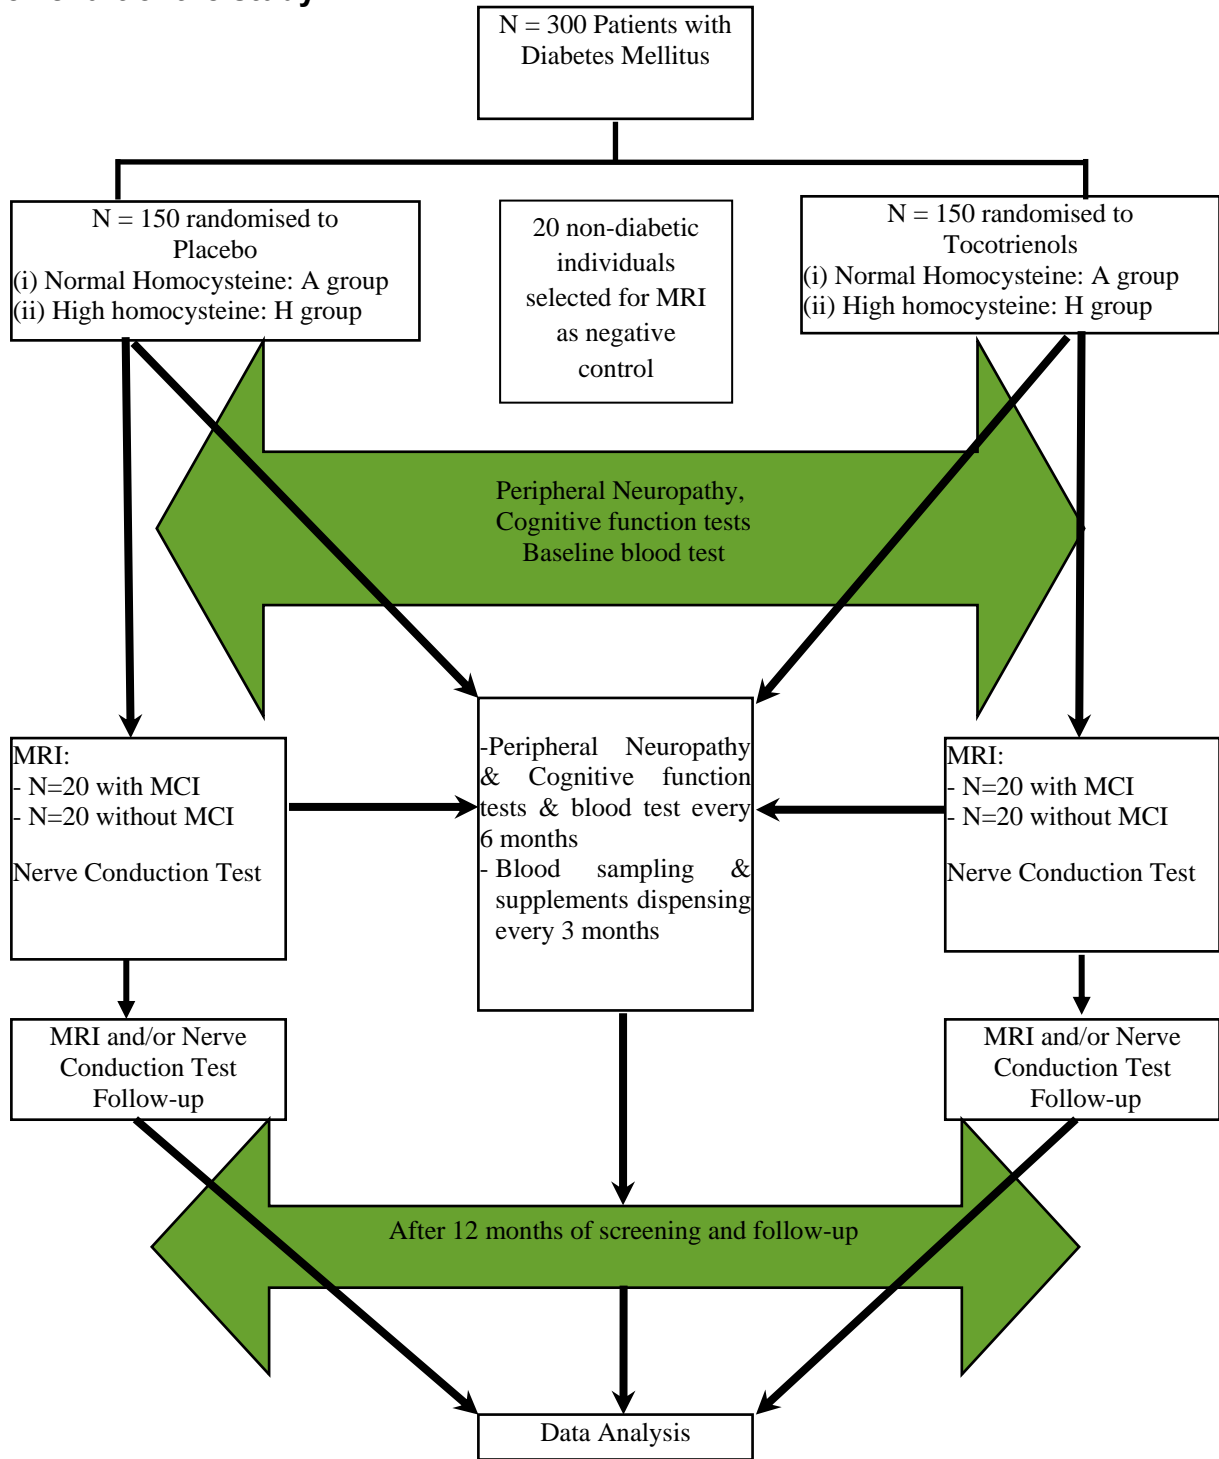

459 **4.5 Measurements**

460

461 **4.5.1 Clinical assessment of peripheral neuropathy**

462 In the present study, clinical assessment will be done through Total Symptoms Score  
463 (TSS). It is a questionnaire in which the patient is asked to assess the intensity (absent,  
464 mild, moderate, severe). Moreover, frequency (now and then, often, continuous) of four  
465 symptoms (pain, burning, paresthesia, numbness) is also assessed resulting in a scaled  
466 score in which 0 means no symptoms and 14.64 means that all four symptoms are severe  
467 and continuously happened. A change of 30% on this scale is considered to be clinically  
468 relevant (or  $\geq 2$  points in patients with a starting score  $\leq 4$  points) (Ziegler et al, 1995). This  
469 assessment will be conducted at the baseline of the study and every 6 months throughout  
470 the study period.

471

472 Neuropathy impairment score (NIS) is a summed score of neurological signs through  
473 which physicians will assess the patient. The NIS will be completed according to Dyck et  
474 al. (1997) at baseline, after 6 months, and 12 months for one year. A standard group of  
475 muscles will be evaluated for weakness and muscle stretch reflexes (biceps, triceps,  
476 brachioradialis, knee, ankle). Perceptions to touch pressure, vibration (128 Hz tuning fork),  
477 joint position, and pinprick perceptions will be graded on the index finger and the great toe  
478 as normal (0), decreased (1), or absent (2).

479

480 **4.5.2 Nerve conduction test**

481 Nerve conduction test will also be performed on consented subjects to evaluate the  
482 conduction performance of the nerve fibers. In the nerve conduction test, the sensory  
483 components of the following nerves will be assessed:

484

- Median nerves
- Radial nerves
- Sural nerves

485

486

487

488 The parameters assessed will be the conduction velocity, latency, and amplitude  
489 through the nerve. This assessment will be conducted at the baseline and 12<sup>th</sup> month of  
490 the study starting from time "0".

491

492 **4.5.2 Blood parameters**

493 Clinical laboratory tests will be conducted and the parameters investigated are:

494

- Fasting blood glucose
- HbA1c
- Liver function test
- Renal function test
- Homocysteine
- Tocotrienols plasma level
- Folic acid
- Vitamin B12
- Vitamin B1

495

496

497

498

499

500

501

502

503 Homocysteine, tocotrienol, folic acid, vitamin B<sub>12</sub>, Vitamin B<sub>1</sub> and fasting blood glucose test  
504 will be conducted at the baseline of the study. Clinical laboratory test including fasting  
505 blood glucose, HbA1c, Liver function test, Renal function test and Tocotrienols plasma  
506 level will be assessed every 3 months throughout the 12 months study period (3<sup>rd</sup>, 6<sup>th</sup>, 9<sup>th</sup>,  
507 and 12<sup>th</sup> month). Homocysteine test will be used to diagnose vitamin B<sub>12</sub> deficiency, and  
508 folate deficiency (Klee, 2000; Robertson et al, 2005; Pagana et al, 2010) Homocysteine,  
509 Folic acid, Vitamin B12 and Vitamin B1 will be assessed on baseline, 6<sup>th</sup> and 12<sup>th</sup> months.

510  
511  
512  
513  
514  
515  
516  
517  
518  
519  
520  
521  
522  
523  
524  
525  
526  
527  
528  
529  
530  
531  
532  
533  
534  
535  
536  
537  
538  
539  
540  
541  
542  
543  
544  
545  
546  
547  
548  
549  
550  
551  
552  
553  
554  
555  
556  
557  
558  
559  
560  
561

#### **4.5.4 Cognitive assessment tools**

Cognitive tests that measure performance in specific domains of interest were chosen because they have been standardized, widely used, have well-established norms, and could be administered by non-neuropsychologists (Mungas et al, 2000). Because of the significant number of Malay-speaking participants, validated translations will be used for the adopted tests with the assistance of the School of Languages, Literacies and Translation, Universiti Sains Malaysia.

Patients will undergo cognitive dysfunction evaluation with the Mini Mental State Examination (MMSE), Montreal Cognitive Assessment (MoCA). These assessments will be conducted at the baseline of the study, at the 6<sup>th</sup> and the 12<sup>th</sup> month of the study period.

##### **4.5.4.1 Mini Mental State Examination (MMSE)**

Based on the 30-points questionnaires, the MMSE is a screening tool that is commonly used for recognizing alterations in cognitive function. It can also detect deficits in cognitive performance for older individuals without dementia. The range of scores is 0 to 30, with increasing scores indicating better cognitive function (Tombaugh and McIntyre, 1992). Cognitive impairment is indicated by this tool if the score is  $\leq 24$ . The specificity of this tool is 96%, although, the sensitivity is weak (64%) (Lomholt and Jurgensen, 1998). It has been used in Malaysia to evaluate cognitive function among elderly pilgrims (Mimi, 2006).

##### **4.5.4.2 Montreal Cognitive Assessment (MoCA)**

The MoCA is a brief cognitive screening tool with high sensitivity and specificity to detect mild cognitive impairment (MCI) in patients performing within the normal range on the MMSE. It is a 10-minute cognitive screening tool designed to assist first-line physicians in detection of MCI, a clinical state that often progresses to dementia (Nasreddine et al, 2005; Zadikoff et al, 2008; Nazem et al, 2009). This tool is available in many languages to fit variant societies. In this study, a Malay version will be constructed and validated.

##### **4.5.4.3 Data collection form**

Demographic information and information pertaining to diabetes and its control will be collected from the data gathered during the clinic visit. These data included age, sex, type and duration of diabetes, HbA1c (A1C), Body mass index (BMI), kidney function, liver function, folic acid and B12 serum level, clinic or self-reported history of hypoglycemia, complications and the type of treatment for diabetes (insulin, oral, medications, and/or lifestyle modification).

#### **4.5.5 Magnetic Resonance Imaging (MRI)**

MRI will be conducted at baseline and at the end of the study to detect development/changes of lesions (WML) in the brain, changes in brain size and to measure the hemodynamic response (change in blood flow) related to neural activity in the brain or spinal cord of humans.

#### **4.6 Ethical considerations**

The study will be conducted after receiving approval from the ethics committee of the Ministry of Health Malaysia. Blood withdrawals are routinely performed on diabetic patients, thus do not represent a burden for the participants. MRI is a non invasive imaging technique that carries no significant risk for the participants. Nerve conduction test (NCT) has a very limited invasiveness and is routinely performed on diabetic patients with peripheral neuropathy. Cognitive function tests (MoCA & MMSE) are not invasive and are interview-based assessment tools.

562 **4.6 Statistical Analyses**

563 All the data collected along the trial will be compiled in Microsoft Excel sheet. Personal  
564 identifying information will be removed prior to statistical analyses except unique coding  
565 details, to allow data clarification if indicated. All data will be analyses according to  
566 intention-to-treat protocol.

567  
568 Descriptive analyses will be performed for all continuous and categorical variables. All  
569 normally distributed continuous variables will be reported in mean (standard deviation),  
570 except otherwise specified. All categorical variables will be reported in frequency and  
571 proportion.

572  
573 Inferential analyses will be performed for comparing variables between tocotrienols and  
574 placebo groups. Comparison for categorical variables between the two groups will be  
575 performed using Chi-square tests, or Fisher's exact test if the assumptions for Chi-square  
576 test were not met. Paired *t*-tests will be employed to detect differences all continuous  
577 clinical and biochemical markers before and after intervention in both groups at 6 and 12  
578 months. Independent *t*-tests will be performed to compare these markers and adverse  
579 event rates across both groups. The two-sided statistical significance level, *p*-value, is set  
580 at 0.05 for all analyses in this study. All analyses will be conducted using Statistical  
581 Package for the Social Sciences (SPSS) version 23.0.

582

583 **5. Research Gantt Chart**

584

| No.  | Activities                  | 2011    | 2012 | 2013 | 2014 | 2015   | 2016   |
|------|-----------------------------|---------|------|------|------|--------|--------|
| 1    | <b>VENUS</b>                |         |      |      |      |        |        |
| i.   | Patient recruitment         | Oct/Nov |      |      | July |        |        |
| ii.  | Data collection             |         |      |      |      | July   |        |
| iii. | Data analysis, final report |         |      |      |      | August |        |
| iv.  | Project completed           |         |      |      |      | Nov    |        |
|      |                             |         |      |      |      |        |        |
| 2    | <b>Extended study</b>       |         |      |      |      |        |        |
| i.   | Patient recruitment         |         |      |      |      | July   |        |
| ii.  | Data collection             |         |      |      |      |        | July   |
| iii. | Data analysis, final report |         |      |      |      |        | August |
| iv.  | Project completed           |         |      |      |      |        | Nov    |

585

586 **6. Significance of the study**

587

- 588 1. Growing number of diabetic patients worldwide, including Malaysia.  
589 2. Most diabetic patients suffer from neurodegeneration with no standard  
590 treatment.  
591 3. Debilitation = high medical/social costs to the nation.  
592 4. Tocotrienols, if proven effective, will have a big impact in the treatment of  
593 diabetes mellitus and the healthcare cost of the nation.  
594 5. Tocotrienols are a truly Malaysian Product

595

596

597

598 **7. Financial support**

599 The study is supported by a research grant from the Malaysian Palm Oil Board (MPOB)  
600 and approved by PEMANDU.

601

602 **8. References**

603 Aksoy, N., H. Vural, T. Sabuncu, O. Arslan and S. Aksoy, (2005). Beneficial effects of  
604 vitamins C and E against oxidative stress in diabetic rats. *Nutr Res* 25:625-630

605

606 Allen K.V., Frier B.M., Strachan M.W. (2004). The relationship between type 2 diabetes  
607 and cognitive dysfunction: longitudinal studies and their methodological limitations. *Eur J*  
608 *Pharmacol* 490:169-175

609

610 American Diabetes Association (ADA) (1992). Standardized measures in diabetic  
611 neuropathy (Consensus Statement). *Diabetes Care* 19 (Suppl. 1):S72–S92

612

613 American Diabetes Association (ADA). (2002) Standards of medical care for patients with  
614 diabetes mellitus (Position Statement). *Diabetes Care* 25(Suppl 1):S33-S49

615

616 American Diabetes Association (ADA). (2008) Standards of Medical care in diabetes 2008.  
617 *Diabetes Care* 31(S1):S12-S54

618

619 Ametov A., Barinov A., Dyke P.J., Hermann R., Kozlova N., Litchy W.J., Low P.A.,  
620 Nehrdich D., Novosadova M., O'Brien P.C., Reljanovic M., Samigullin R., Schuette K.,  
621 Stokov I., Tritschler H.J., Wessel K., Yakhno N. & Ziegler D., (2003). The Sensory  
622 Symptoms of Diabetic Polyneuropathy Are Improved With  $\alpha$ -Lipoic Acid: the SYDNEY  
623 Trial. *Diabetes Care* 26, p.770–6.

624

625 Anderson R.J., Freedland K.E., Clouse R.E., Lustman P.J. (2001). The prevalence of  
626 comorbid depression in adults with diabetes: a meta-analysis. *Diabetes Care* 24:1069-  
627 1078

628

629 Awad N., Gagnon M., Messier C. (2004). The relationship between impaired glucose  
630 tolerance, type 2 diabetes, and cognitive function. *J Clin Exp Neuropsychol*, 26:1044-1080

631

632 Budin S.B., Othman F., Louis S.R., Bakar M.A., Das S., Mohamed J. (2009). The effects of  
633 palm oil tocotrienol-rich fraction supplementation on biochemical parameters, oxidative  
634 stress and the vascular wall of streptozotocin-induced diabetic rats. *Clinics* (3): 235–44

635

636 Deary I.J., Crawford J.R., Hepburn D.A., Langan S.J., Blackmore L.M., Frier B.M. (1993).  
637 Severe hypoglycemia and intelligence in adult patients with insulin-treated diabetes.  
638 *Diabetes* 42:341-344

639

640 Dejgaard A., Gade A., Larsson H., Balle V., Parving A., Parving H.H. (1991). Evidence for  
641 diabetic encephalopathy. *Diabetic Med*, 8, 162-167.

642

643 Dyck P.J., Davies J.L., Litchy W.J., O'Brien P.C., (1997). Longitudinal assessment of  
644 diabetic polyneuropathy using a composite score in the Rochester Diabetic Neuropathy  
645 Study cohort. *Neurology* 49:229–239

646

647 Elderkin-Thompson V., Kumar A., Bilker W.B., Dunkin J.J., Mintz J., Moberg P.J.,  
648 Meshulam R.I., Gur R.E. (2003). Neuropsychological deficits among patients with late-  
649 onset minor and major depression. *Arch Clin Neuropsychol*, 18, 529-549.



650  
651 Ferguson S.C., Blane A., Perros P., McCrimmon R.J., Best J.J., Wardlaw J., Deary I.J.,  
652 Frier B.M. (2003). Cognitive ability and brain structure in type 1 diabetes: relation to  
653 microangiopathy and preceding severe hypoglycemia. *Diabetes*, 52, 149-156.  
654  
655 Gaede P., Vedel P., Larsen N., Jensen G.V., Parving H.H., and Pedersen O. (2003)  
656 Multifactorial intervention and cardiovascular disease in patients with type 2  
657 diabetes. *N Engl J Med*, 348, 383-393.  
658  
659 Klee GG, (2000). Cobalamin and folate evaluation: measurement of methylmalonic acid  
660 and homocysteine vs vitamin B(12) and folate. *Clin Chem.*;46:1277-1283.  
661  
662 Gregg E.W., Brown A., (2003). Cognitive and physical disabilities and aging-related  
663 complications of diabetes. *Clinical Diabetes*, 12(3), p.113-118.  
664  
665 Jensen T.S., Backonja M-M., Jimenez S.H., Tesfye S., Valensi P. & Ziegler D., (2006).  
666  
667 New perspectives on the management of diabetic peripheral neuropathic pain. *Diabetes*  
668 *Vasc Dis*, 3, p. 108-119.  
669  
670 Khanna S., Roy S., Slivka A., Craft T.K., Chaki S., Rink C., Notestine M.A., DeVries A.C.,  
671 Parinandi N.L., Sen C.K., (2005). Neuroprotective properties of the natural vitamin E  
672 alpha-tocotrienol. *Stroke*. 36(10), p. 2258-2264  
673  
674 Kuhad A., Bishnoi M., Tiwari V., Chopra K. (2009). Suppression of NF-kappabeta  
675 signaling pathway by tocotrienol can prevent diabetes associated cognitive deficits.  
676 *Pharmacology, Biochemistry, and Behavior*(2): 251–9.  
677  
678 Kuhad A, Chopra K. (2009). Tocotrienols attenuates oxidative-nitrosative stress and  
679 inflammatory cascade in experimental model of diabetic neuropathy.  
680 *Neuropharmacology* 57:456-462.  
681  
682 Kumar R., Looi J.C.L., Raphael B., (2009). Type 2 diabetes mellitus, cognition and brain in  
683 aging: A brief review. *Indian J Psychiatry*. 51, S35-S38.  
684  
685 Lawton, M.P., and Brody, E.M.(1969). Assessment of older people: Self-maintaining and  
686 instrumental activities of daily living. *Gerontologist*, 9:179-186.  
687  
688 Lockwood K.A., Alexopoulos G.S., van Gorp W.G. (2002). Executive dysfunction in  
689 geriatric depression. *Am J Psychiatry*, 159, 1119-1126.  
690  
691 Lomholt RK, Jurgensen KS, (1998): [The minimal state examination in screening of  
692 cognitive dysfunction and dementia] [article in Danish]. *Ugeskr Laeger* 160:7251–7254.  
693  
694 Lawton, M.P., and Brody, E.M. "Assessment of older people: Self-maintaining and  
695 instrumental activities of daily living." *Gerontologist* 9:179-186, (1969).  
696  
697 Magosso E, Ansari MA, Yogheswaran G, Shuaib IL, Khan NAK, Yuen KH, Rizal MAB,  
698 Wong JW, Ng H, Nesaretnam K. (2010) Tocotrienols and Nonalcoholic Fatty Liver: a  
699 Clinical Experience. 61<sup>st</sup> *Liver Meeting*, American Association for the Study of Liver  
700 Diseases (AASLD). 28 October-2 November 2010, Hynes Convention Center, Boston,  
701 MA (USA). In *Hepatology* 2010;52(4 Supp):642  
702

703 Mimi O., Looi, P.S., Lee, F.S., (2006) Cognitive Function of Elderly Haj Pilgrims in  
704 Malaysia. *Malaysian Journal of Psychiatry*, 15 (2). pp. 18-21. ISSN 0128-8628  
705  
706  
707 Morris M.C., Evand D.A., Bienias J.L., Tangney C.C., Wilson R.S. (2002). Vitamin E and  
708 cognitive decline in older persons. *Arch Neurol*, 59:1125-32.  
709  
710 Mungas D., Reed B.R., Marshall S.C., Gonzalez H.M.(2000). Development of  
711 psychometrically matched English and Spanish language neuropsychological tests for  
712 older persons. *Neuropsychology* 14:209– 223.  
713  
714 Nasreddine Z.S., Philips N.A., Bedrian V., Charboneua S., Whitehead V., Collin I.,  
715 Cummings J.L., Chertkow H. (2005). The montreal cognitive assessment, MoCA : A  
716 brief screening tool for mild cognitive impairment. *J Am Geriatr Soc.* 53 (4), P.659-699.  
717  
718 Nazem S., Siderowf A.D., Duda J.E., Have T., Colcher A., Horn S.S., et al. (2009).  
719  
720 Montreal cognitive assessment performance in patients with Parkinson's disease with  
721 "normal" global cognition according to mini-mental state examination score. *J Am Geriatr*  
722 *Soc.* 57(2):304-8.  
723  
724 Nesaretnam K, Selvaduray KR, Ghazali AR, Veerasenan SD, Gomez PA. (2010)  
725 Effectiveness of tocotrienol-rich fraction combined with tamoxifen in the management  
726 of women with early breast cancer: a pilot clinical trial. *Breast Cancer Res* 12:R81  
727 (<http://breast-cancer-research.com/content/pdf/bcr2726.pdf>)  
728  
729 Pagana KD, Pagana TJ (2010). *Mosby's Manual of Diagnostic and Laboratory Tests*, 4th  
730 ed. St. Louis: Mosby Elsevier.  
731  
732 Perros P. and Frier B.M. (1997). The long-term sequelae of severe hypoglycemia on the  
733 brain in insulin-dependent diabetes mellitus. *Horm. Metab Res*, 29, 197-202  
734  
735 Reichard P., Britz A., Rosenqvist U. (1991). Intensified conventional insulin treatment and  
736 neuropsychological impairment. *BMJ*, 303, 1439-1442.  
737  
738 Reske-Nielsen E., Lundbaek K., Rafaelsen O.J. (1965). Pathological changes in the  
739 central and peripheral nervous system of young long-term diabetics. *Diabetologia*, 1, 233-  
740 241.  
741  
742 Robertson J, Iemolo F, Stabler SP, Allen RH, Spence JD, (2005). Vitamin B12,  
743 homocysteine and carotid plaque in the era of folic acid fortification of enriched cereal  
744 grain products. *CMAJ*;172(12):1569- 73.  
745  
746 Rodriguez G., Nobili F., Celestino M.A., Francione S., Gulli G., Hassan K., Marengo S.,  
747 Rosadini G., Cordera R. (1993). Regional cerebral blood flow and cerebrovascular  
748 reactivity in IDDM. *Diabetes Care*, 16, 462-468  
749  
750 Roper N., Logan W.W. & Tierney A.J. (2000). *The Roper-Logan-Tierney Model of*  
751 *Nursing: Based on Activities of Living*. Edinburgh: Elsevier Health Sciences. ISBN  
752 0443063737.  
753  
754 Ryan C.M., Williams T.M., Finegold D.N., Orchard T.J. (1993). Cognitive dysfunction in  
755 adults with type 1 (insulin-dependent) diabetes mellitus of long duration: effects of

756 recurrent hypoglycemia and other chronic complications. *Diabetologia*, 36,329-334  
757

758 Ryan C.M., Williams T.M., Orchard T.J., Finegold D.N. (1992). Psychomotor slowing is  
759 associated with distal symmetrical polyneuropathy in adults with diabetes mellitus.  
760 *Diabetes* 41, 107-113.

761

762 Ryle C., Leow C., Donaghy M. (1997). Nonenzymatic glycation of peripheral and central  
763 nervous system proteins in experimental diabetes mellitus. *Muscle Nerve*, 20,577-84.  
764

765 Sachon C., Grimaldi A., Digy J.P., Pillon B., Dubois B., Thervet F. (1992). Cognitive  
766 function, insulin-dependent diabetes and hypoglycemia. *J Intern Med*, 231,471-475  
767

768 Sen C.K., Khanna S. Packer L. (2000). Molecular basis of vitamine E action. Tocotrienol  
769 potently inhibits glutamate-induced pp60(c-Src) kinase activation and death of HT4  
770 neuronal cells. *J. Bio. Chem.* 275 (17): 13049-55.  
771

772 Srivatsan R., Das S., Gadde R., Manoj-Kumar K., Taduri S., Rao N., Ramesh B.,  
773 Baharani A., Shah K., Kamireddy SC., Priyatham G., Balakumaran T.A., Seshadri S.,  
774 Kamath A., & Rao A., (2009). Antioxidants and lipid peroxidation status in diabetic  
775 patients with and without complications. *Arch Iranian Med.* 12 (2):p,121 –127  
776

777 Stewart R., Liolitsa D. (1999). Type 2 diabetes mellitus, cognitive impairment and  
778 dementia. *Diabet Med*, 16, 93-112.  
779

780 Tesfaye, S. (2007). Clinical Features of Diabetic Polyneuropathy. In: *Diabetic*  
781 *Neuropathy: Clinical Management* (Veves, M. and Malik, R., eds). Humana Press Inc.,  
782 Totowa, NJ.  
783

784 The Diabetes Control and Complications Trial Research Group, (1993). The effect of  
785 intensive treatment of diabetes on the development and progression of long-term  
786 complications in insulin-dependent diabetes mellitus. *N Engl J Med* 329:977–986.  
787

788 Tiwari V., Kuhad A., Chopra K. (2009). Suppression of neuro-inflammatory signaling  
789 cascade by tocotrienol can prevent chronic alcohol-induced cognitive dysfunction in rats.  
790 *Behavioural Brain Research* 203: 296-303.  
791

792 Tombaugh T.N., McIntyre N.J.(1992). The Mini- Mental State Examination: a  
793 comprehensive review. *J Am Geriatr Soc* 40:922–935.  
794

795 Tutuncu N.B., Bayraktar M., Varli K., (1998). Reversal of defective nerve conduction with  
796 vitamin E supplementation in type 2 diabetes. *Diabetes Care.* 12, p. 1915-1918.  
797

798 Wredling R., Levander S., Adamson U., Lins P.E. (1990). Permanent neuropsychological  
799 impairment after recurrent episodes of severe hypoglycemia in man. *Diabetologia*,  
800 33, 152-157.  
801

802 Young IS., Torney JJ., Trimble ER., (1992). The effect of ascorbate supplementation on  
803 oxidative stress in the streptozotocin diabetic rat. *Free Rad Biol Med.* p,13:41–46.  
804

805 Zadikoff C, Fox SH, Tang-Wai DF, Thomsen T, de Bie RM, Wadia P, et al. (2008). A  
806 comparison of the mini mental state exam to the Montreal cognitive assessment  
807 in identifying cognitive deficits in Parkinson's disease. *Mov Disord.* 23(2):297-9.

808

809 Zar J.H., (1995). Power and sample size in tests for difference between two means, In:  
810 Biostatistical analysis, 3<sup>rd</sup> edition. Prentice Hall, New Jersey. p, 133.

811

812 Ziegler D, Hanefeld M, Ruhnau KJ, et al., (1995). Treatment of symptomatic diabetic  
813 peripheral neuropathy with the anti-oxidant a-lipoic acid. *Diabetologia*. 38, p.1425-33.

814

815 Ziegler D., Ametov A., Barinov A., Dyke P.J., Gurieva I, Low P.A., Munzel U., Yakhno N.,  
816 Raz I., Novosadova M., Maus, J., & Samigullin R., (2006). Oral treatment with alpha-lipoic  
817 acid improves symptomatic diabetic polyneuropathy: the SYDNEY 2 trial. *Diabetes Care*,  
818 29, p.2365–2.

819

820

821

822

823

824

825
