# Supplementary material
Source: PubMed Central journal article supplement (PMC5885181)
Supplement: jamaneurol-75-444-s002.pdf [file jamaneurol-75-444-s002.pdf]

## Supplementary Online Content

Hor CP, Fung WY, Ang HA, et al; Vitamin E in Neuroprotection Study (VENUS) Investigators. Efficacy of oral mixed tocotrienols in diabetic peripheral neuropathy: a randomized clinical trial. *JAMA Neurol*. Published online January 29, 2018. doi:10.1001/jamaneurol.2017.4609

**eTable 1.** Symptoms and Scoring of TSS for DPN

**eTable 2.** Baseline Characteristics for Withdrawn Subjects by Study Group

**eTable 3.** Mean NIS and Score Changes Over 12 Months by Study Group

**eTable 4.** Sensory Nerve Conduction Test by Study Group

**eTable 5.** Glycemic Control Over 12 Months by Study Group

**eTable 6.** Serum Homocysteine, Vitamins B<sub>9</sub> and B<sub>12</sub> Over 12 Months by Baseline Homocysteine

**eTable 7.** Common Adverse Events Reported by Study Group

**eTable 8.** Serious Adverse Events Reported by Study Group

This supplementary material has been provided by the authors to give readers additional information about their work.

**eTable 1. Symptoms and Scoring of TSS for DPN**

| Frequency/ Intensity | Absent | Mild | Moderate | Severe |
|----------------------|--------|------|----------|--------|
| Occasional           | 0      | 1.00 | 2.00     | 3.00   |
| Often                | 0      | 1.33 | 2.33     | 3.33   |
| Continuous           | 0      | 1.66 | 2.66     | 3.66   |

The symptoms were scored for paresthesia (pricking sensation), burning pain and lancinating pain, and asleep numbness.

**eTable 2. Baseline Characteristics for Withdrawn Subjects by Study Group**

| Characteristics                                  | Placebo        | Tocotrienols  | p-value |
|--------------------------------------------------|----------------|---------------|---------|
|                                                  | n=32           | n=39          |         |
| Male, %                                          | 40.6           | 41.0          | 0.973   |
| Age, mean (SD), years                            | 57.8 (10.23)   | 58.2 (9.93)   | 0.867   |
| Duration of diabetes, mean (SD), years           | 9.8 (6.58)     | 11.7 (6.79)   | 0.260   |
| Body mass index, mean (SD), (kg/m <sup>2</sup> ) | 28.1 (6.29)    | 27.7 (5.38)   | 0.773   |
| Treatment include insulin, %                     | 50.0           | 53.8          | 0.747   |
| Hypertension, %                                  | 68.8           | 74.4          | 0.601   |
| Hypercholesterolemia, %                          | 81.3           | 89.7          | 0.330   |
| Ischemic heart disease, %                        | 21.9           | 7.7           | 0.168   |
| HbA <sub>1c</sub> , %                            | 9.3 (2.18)     | 9.2 (1.87)    | 0.890   |
| Fasting blood glucose, mean (SD), mmol/L         | 9.3 (4.17)     | 8.5 (3.63)    | 0.390   |
| Serum homocysteine, mean (SD), μmol/L            | 13.5 (4.42)    | 14.3 (9.51)   | 0.642   |
| Serum vitamin B <sub>9</sub> , mean (SD), ng/mL  | 8.8 (4.87)     | 10.0 (5.65)   | 0.328   |
| Serum vitamin B <sub>12</sub> , mean (SD), pg/mL | 593.4 (224.07) | 523.5 (37.62) | 0.207   |
| Total TSS, mean (SD)                             | 6.5 (2.55)     | 7.8 (2.95)    | 0.061   |
| Total NIS, mean (SD)                             | 15.7 (8.33)    | 14.9 (9.76)   | 0.727   |

All values are presented as mean (SD) unless stated otherwise. HbA<sub>1c</sub>, glycated haemoglobin; TSS, Total Symptom Score; NIS, Neuropathy Impairment Score.

Seven subjects from placebo group and 12 from tocotrienols group withdrew due to adverse events. In the placebo group, 1 reported worsening of DPN symptoms, 2 with skin rashes, 1 non-specific soft tissue swelling of lower limb, 1 developed upper gastrointestinal bleeding, 1 had renal carcinoma and another underwent below knee amputation. In the tocotrienols group, 1 developed acute gastroenteritis, 1 skin rashes, 1 urinary tract infection with worsening of DPN symptoms, 1 non-specific soft tissue swelling, 1 neck pain, 1 bodyache, 1 headache, 1 minor epistaxis, 1 exacerbation of psoriasis, 1 acute flare of systemic lupus erythematosus, 1 varicose vein and 1 non-healing diabetic foot ulcer.

**eTable 3.** Total NIS and Component Score Changes Over 12 Months by Study Group

| Component                                                                                            | Placebo     |                           | Tocotrienols |                           | p-value<br>(between<br>groups) |
|------------------------------------------------------------------------------------------------------|-------------|---------------------------|--------------|---------------------------|--------------------------------|
|                                                                                                      | Mean (SD)   | p-value<br>(within group) | Mean (SD)    | p-value<br>(within group) |                                |
| <b>Total NIS</b>                                                                                     |             |                           |              |                           |                                |
| Baseline (B)                                                                                         | 15.8 (8.41) |                           | 16.2 (9.04)  |                           |                                |
| 6-month (6M)                                                                                         | 12.6 (7.82) | <0.001                    | 14.9 (10)    | 0.010                     |                                |
| 12-month (12M)                                                                                       | 12.1 (8.67) | <0.001                    | 13.4 (9.65)  | <0.001                    |                                |
| Change (6M-B)                                                                                        | -3.3 (6.66) |                           | -1.9 (7.89)  |                           | 0.117                          |
| Change (12M-B)                                                                                       | -3.9 (7.47) |                           | -3.3 (7.9)   |                           | 0.529                          |
| <b>Muscle strength (combined score for bilateral biceps, triceps, brachio-radialis, knee, ankle)</b> |             |                           |              |                           |                                |
| Baseline (B)                                                                                         | 0.2 (1.19)  |                           | 0.1 (0.5)    |                           |                                |
| 6-month (6M)                                                                                         | 0.1 (0.57)  | 0.128                     | 0.1 (0.61)   | 1.000                     |                                |
| 12-month (12M)                                                                                       | 0 (0)       | 0.135                     | 0.2 (0.64)   | 0.574                     |                                |
| Change (6M-B)                                                                                        | -0.1 (0.86) |                           | 0 (0.43)     |                           | 0.176                          |
| Change (12M-B)                                                                                       | -0.1 (0.98) |                           | 0 (0.67)     |                           | 0.125                          |
| <b>Reflex (combined score for bilateral biceps, triceps, brachio-radialis, knee, ankle)</b>          |             |                           |              |                           |                                |
| Baseline (B)                                                                                         | 6.2 (5.65)  |                           | 6.5 (6.28)   |                           |                                |
| 6-month (6M)                                                                                         | 4.7 (5.30)  | <0.001                    | 6.5 (6.50)   | 0.492                     |                                |
| 12-month (12M)                                                                                       | 5.1 (6.01)  | 0.026                     | 5.8 (6.31)   | 0.110                     |                                |
| Change (6M-B)                                                                                        | -1.5 (4.6)  |                           | -0.3 (5.41)  |                           | 0.073                          |
| Change (12M-B)                                                                                       | -1.1 (5.14) |                           | -0.9 (5.83)  |                           | 0.809                          |
| <b>Sensation (combined score for bilateral index finger)</b>                                         |             |                           |              |                           |                                |
| Baseline (B)                                                                                         | 3.3 (2.40)  |                           | 2.9 (2.62)   |                           |                                |
| 6-month (6M)                                                                                         | 2.5 (2.52)  | 0.002                     | 2.2 (2.48)   | 0.002                     |                                |
| 12-month (12M)                                                                                       | 1.9 (2.20)  | <0.001                    | 1.8 (2.22)   | <0.001                    |                                |
| Change (6M-B)                                                                                        | -0.8 (2.75) |                           | -0.9 (3.11)  |                           | 0.698                          |
| Change (12M-B)                                                                                       | -1.3 (2.53) |                           | -1.2 (3.18)  |                           | 0.763                          |
| <b>Sensation (combined score for bilateral great toe)</b>                                            |             |                           |              |                           |                                |
| Baseline (B)                                                                                         | 6.2 (3.52)  |                           | 6.8 (4.02)   |                           |                                |
| 6-month (6M)                                                                                         | 5.3 (3.52)  | <0.001                    | 6.1 (4.24)   | 0.01                      |                                |
| 12-month (12M)                                                                                       | 5.0 (3.41)  | <0.001                    | 5.6 (4.47)   | <0.001                    |                                |
| Change (6M-B)                                                                                        | -1.0 (2.92) |                           | -0.8 (3.39)  |                           | 0.663                          |
| Change (12M-B)                                                                                       | -1.4 (3.19) |                           | -1.3 (3.61)  |                           | 0.853                          |

NIS, Neuropathy Impairment Score.

**eTable 4. Sensory Nerve Conduction Test by Study Group**

| Nerve / Sites                  | Baseline     |              |                 | Month-12    |              |                 |
|--------------------------------|--------------|--------------|-----------------|-------------|--------------|-----------------|
|                                | Placebo      | Tocotrienols | <i>p</i> -value | Placebo     | Tocotrienols | <i>p</i> -value |
| <b>Median nerve</b>            |              |              |                 |             |              |                 |
| <b>Medial Palm- wrist</b>      |              |              |                 |             |              |                 |
| Latency (ms)                   | 2.5 (0.86)   | 2.5 (0.85)   | 0.931           | 2.4 (0.45)  | 2.5 (0.56)   | 0.521           |
| Amplitude Pk-P (μV)            | 11.1 (4.82)  | 11.6 (6.63)  | 0.740           | 14.4 (9.7)  | 11.6 (5.55)  | 0.243           |
| Velocity (m/s)                 | 31.3 (5.32)  | 31 (5.66)    | 0.869           | 35.3 (5.97) | 34.4 (7.34)  | 0.666           |
| <b>Ulnar Palm-wrist</b>        |              |              |                 |             |              |                 |
| Latency (ms)                   | 2.0 (0.33)   | 2.2 (0.91)   | 0.406           | 1.7 (0.24)  | 1.7 (0.18)   | 0.410           |
| Amplitude Pk-P (μV)            | 8.8 (4.88)   | 9.7 (5.75)   | 0.533           | 8.8 (5.31)  | 8.4 (6.18)   | 0.825           |
| Velocity (m/s)                 | 41.3 (6.47)  | 40 (7.75)    | 0.524           | 50.5 (6.79) | 48.3 (4.94)  | 0.255           |
|                                |              |              |                 |             |              |                 |
| <b>Radial nerve</b>            |              |              |                 |             |              |                 |
| <b>Forearm- thumb</b>          |              |              |                 |             |              |                 |
| Latency (ms)                   | 2.0 (0.40)   | 2.0 (0.31)   | 0.932           | 2.1 (0.57)  | 2.2 (0.33)   | 0.547           |
| Amplitude Pk-P (μV)            | 23.3 (11.59) | 18.1 (13.69) | 0.161           | 15.7 (9.07) | 13.7 (8.68)  | 0.441           |
| Velocity (m/s)                 | 48.8 (5.8)   | 50.1 (7.52)  | 0.511           | 52 (9.31)   | 47.6 (6.17)  | 0.062           |
|                                |              |              |                 |             |              |                 |
| <b>Sural nerve</b>             |              |              |                 |             |              |                 |
| <b>Calf- lateral malleolus</b> |              |              |                 |             |              |                 |
| Latency (ms)                   | 2.5 (0.61)   | 3.2 (2.0)    | 0.166           | 2.3 (0.66)  | 2.5 (0.82)   | 0.463           |
| Amplitude Pk-P (μV)            | 6.6 (8.65)   | 28.2 (91.22) | 0.312           | 8.2(5.55)   | 6.7 (5.93)   | 0.415           |
| Velocity (m/s)                 | 45.4 (8.37)  | 42.6 (13.4)  | 0.438           | 48.4(10.13) | 46.3 (9.99)  | 0.530           |
|                                |              |              |                 |             |              |                 |

**eTable 5.** Glycemic Control Over 12 Months by Study Group

| Biomarkers                           | Placebo<br>(n=150) |                                      | Tocotrienols<br>(n=150) |                                      | <i>p</i> -value<br>(between<br>groups) |
|--------------------------------------|--------------------|--------------------------------------|-------------------------|--------------------------------------|----------------------------------------|
|                                      | Mean (SD)          | <i>p</i> -value<br>(within<br>group) | Mean (SD)               | <i>p</i> -value<br>(within<br>group) |                                        |
| <b>HbA<sub>1c</sub>, %</b>           |                    |                                      |                         |                                      |                                        |
| Baseline (B)                         | 8.7 (1.82)         |                                      | 9.1 (1.97)              |                                      |                                        |
| 6-month (6M)                         | 8.9 (2.01)         | 0.034                                | 9.3 (2.28)              | 0.412                                |                                        |
| 12-month (12M)                       | 9.0 (2.17)         | 0.012                                | 9.2 (2.08)              | 0.424                                |                                        |
| Change (6M-B)                        | 0.3 (1.47)         |                                      | 0.1 (1.69)              |                                      | 0.453                                  |
| Change (12M-B)                       | 0.4 (1.81)         |                                      | 0.1 (1.64)              |                                      | 0.190                                  |
|                                      |                    |                                      |                         |                                      |                                        |
| <b>Fasting blood glucose, mmol/L</b> |                    |                                      |                         |                                      |                                        |
| Baseline (B)                         | 8.4 (3.34)         |                                      | 9.0 (4.24)              |                                      |                                        |
| 6-month (6M)                         | 8.8 (4.04)         | 0.049                                | 9.0 (3.85)              | 0.917                                |                                        |
| 12-month (12M)                       | 9.4 (4.75)         | 0.002                                | 9.6 (5.18)              | 0.650                                |                                        |
| Change (6M-B)                        | 0.7 (3.81)         |                                      | 0 (4.86)                |                                      | 0.197                                  |
| Change (12M-B)                       | 1.3 (4.44)         |                                      | 0.3 (6.37)              |                                      | 0.172                                  |
|                                      |                    |                                      |                         |                                      |                                        |

HbA<sub>1c</sub>, glycated haemoglobin

**eTable 6.** Serum Homocysteine, Vitamins B<sub>9</sub> and B<sub>12</sub> Over 12 Months by Baseline Homocysteine

| Biomarkers                                            | Placebo        |                        | Tocotrienols   |                        | p-value (between groups) |
|-------------------------------------------------------|----------------|------------------------|----------------|------------------------|--------------------------|
|                                                       | Mean (SD)      | p-value (within group) | Mean (SD)      | p-value (within group) |                          |
| <b>Normohomocysteinemia, A-subgroup, &lt;15µmol/L</b> |                |                        |                |                        |                          |
| <b>Homocysteine, µmol/L</b>                           |                |                        |                |                        |                          |
| Baseline (B)                                          | 10.9 (2.28)    |                        | 10.6 (2.39)    |                        |                          |
| 6-month (6M)                                          | 11.5 (2.99)    | 0.019                  | 11.2 (2.70)    | 0.019                  |                          |
| 12-month (12M)                                        | 11.9 (3.55)    | 0.007                  | 11.3 (3.18)    | 0.008                  |                          |
| Change (6M-B)                                         | 0.6 (2.33)     |                        | 0.6 (2.23)     |                        | 0.951                    |
| Change (12M-B)                                        | 1.0 (3.34)     |                        | 0.8 (2.57)     |                        | 0.717                    |
| <b>Serum vitamin B<sub>9</sub>, ng/mL</b>             |                |                        |                |                        |                          |
| Baseline (B)                                          | 10.1 (5.66)    |                        | 9.8 (5.81)     |                        |                          |
| 6-month (6M)                                          | 10.6 (6.18)    | 0.440                  | 10.3 (5.15)    | 0.032                  |                          |
| 12-month (12M)                                        | 10.4 (5.47)    | 0.752                  | 9.8 (4.82)     | 0.487                  |                          |
| Change (6M-B)                                         | 0.4 (5.49)     |                        | 1.1 (4.94)     |                        | 0.395                    |
| Change (12M-B)                                        | 0.2 (5.66)     |                        | 0.5 (5.92)     |                        | 0.751                    |
| <b>Serum vitamin B<sub>12</sub>, pg/mL</b>            |                |                        |                |                        |                          |
| Baseline (B)                                          | 638.7 (335.53) |                        | 655.1 (328.70) |                        |                          |
| 6-month (6M)                                          | 594.7 (262.6)  | 0.032                  | 682.3 (357.88) | 0.918                  |                          |
| 12-month (12M)                                        | 614.6 (312.02) | 0.428                  | 661.6 (315.13) | 0.536                  |                          |
| Change (6M-B)                                         | -47.1 (211.59) |                        | -2.9 (249.41)  |                        | 0.201                    |
| Change (12M-B)                                        | -24.8 (292.05) |                        | -24.0 (332.07) |                        | 0.987                    |
| <b>Hyperhomocysteinemia, H-subgroup, ≥15µmol/L</b>    |                |                        |                |                        |                          |
| <b>Homocysteine, µmol/L</b>                           |                |                        |                |                        |                          |
| Baseline (B)                                          | 19.4 (5.60)    |                        | 19.8 (8.39)    |                        |                          |
| 6-month (6M)                                          | 13.9 (4.44)    | <0.001                 | 13.6 (3.51)    | <0.001                 |                          |
| 12-month (12M)                                        | 14.9 (6.21)    | <0.001                 | 14.4 (4.61)    | <0.001                 |                          |
| Change (6M-B)                                         | -5.9 (5.13)    |                        | -5.6 (4.70)    |                        | 0.736                    |
| Change (12M-B)                                        | -5.1 (5.80)    |                        | -4.9 (5.14)    |                        | 0.852                    |
| <b>Serum vitamin B<sub>9</sub>, ng/mL</b>             |                |                        |                |                        |                          |
| Baseline (B)                                          | 7.5 (3.54)     |                        | 8.0 (4.18)     |                        |                          |
| 6-month (6M)                                          | 16.3 (8.53)    | <0.001                 | 14.6 (7.32)    | <0.001                 |                          |
| 12-month (12M)                                        | 14.7 (8.1)     | <0.001                 | 15.4 (7.55)    | <0.001                 |                          |
| Change (6M-B)                                         | 8.8 (7.98)     |                        | 6.6 (7.61)     |                        | 0.225                    |
| Change (12M-B)                                        | 7.2 (8.51)     |                        | 7.2 (8.08)     |                        | 0.998                    |
| <b>Serum vitamin B<sub>12</sub>, pg/mL</b>            |                |                        |                |                        |                          |
| Baseline (B)                                          | 480.8 (177.99) |                        | 505.4 (267.53) |                        |                          |
| 6-month (6M)                                          | 703.9 (318.23) | <0.001                 | 635.5 (315.82) | 0.011                  |                          |
| 12-month (12M)                                        | 663.6 (280.63) | <0.001                 | 728.4 (404.09) | 0.008                  |                          |
| Change (6M-B)                                         | 224.5 (303.12) |                        | 115.2 (274.46) |                        | 0.103                    |
| Change (12M-B)                                        | 183.4 (260.02) |                        | 193.8 (419.69) |                        | 0.905                    |

**eTable 7. Common Adverse Events Reported by Study Group**

| Event                                                  | Placebo                |        | Tocotrienols           |        | p-value<br>(by events) |
|--------------------------------------------------------|------------------------|--------|------------------------|--------|------------------------|
|                                                        | Participants,<br>n (%) | Events | Participants,<br>n (%) | Events |                        |
| <b>Adverse events</b>                                  | 30 (20.0)              | 34     | 30 (20.0)              | 35     | 1                      |
| <b>Cardiac disorders</b>                               | 0                      | 0      | 1 (0.7)                | 1      | 1                      |
| <b>Gastrointestinal disorders</b>                      | 1 (0.7)                | 1      | 3 (2.0)                | 3      | 0.622                  |
| <b>Hepatobiliary disorders</b>                         | 0                      | 0      | 1 (0.7)                | 1      | 1                      |
| <b>Infections and infestations</b>                     | 8 (5.3)                | 8      | 3 (2.0)                | 3      | 0.218                  |
| <b>Injury, poisoning and procedural complications</b>  | 5 (3.3)                | 5      | 9 (6.0)                | 9      | 0.413                  |
| <b>Metabolism and nutrition disorders</b>              | 1 (0.7)                | 1      | 1 (0.7)                | 1      | 1                      |
| <b>Musculoskeletal and connective tissue disorders</b> | 1 (0.7)                | 1      | 4 (2.7)                | 4      | 0.371                  |
| <b>Nervous system disorders</b>                        | 4 (2.7)                | 4      | 1 (0.7)                | 1      | 0.371                  |
| <b>Reproductive system and breast disorders</b>        | 1 (0.7)                | 1      | 0                      | 0      | 1                      |
| <b>Respiratory, thoracic and mediastinal disorders</b> | 2 (0.7)                | 2      | 1 (0.7)                | 1      | 1                      |
| <b>Skin and subcutaneous tissue disorders</b>          | 10 (6.7)               | 10     | 9 (6.0)                | 9      | 1                      |
| <b>Surgical and medical procedures</b>                 | 1 (0.7)                | 1      | 0                      | 0      | 1                      |
| <b>Vascular disorders</b>                              | 0                      | 0      | 2 (1.3)                | 2      | 0.498                  |

Some subjects developed more than one event throughout the study.



**eTable 8. Serious Adverse Events Reported by Study Group**

| Event                                                  | Placebo              |        | Tocotrienols         |        | $\rho$ -value<br>(by events) |
|--------------------------------------------------------|----------------------|--------|----------------------|--------|------------------------------|
|                                                        | Participants, n, (%) | Events | Participants, n, (%) | Events |                              |
| <b>Serious adverse events</b>                          | 15 (10.0)            | 21     | 24 (16.0)            | 27     | 0.431                        |
| <b>Cardiovascular disorders</b>                        | 6 (4.0)              | 9      | 3 (2.0)              | 3      | 0.138                        |
| <b>Gastrointestinal disorders</b>                      | 2 (1.3)              | 2      | 0                    | 0      | 0.498                        |
| <b>Hepatobiliary disorders</b>                         | 0                    | 0      | 1 (0.7)              | 1      | 1                            |
| <b>Infections and infestations</b>                     | 1 (0.7)              | 2      | 10 (6.7)             | 10     | 0.035                        |
| <b>Injury, poisoning and procedural complications</b>  | 1 (0.7)              | 1      | 2 (1.3)              | 2      | 1                            |
| <b>Metabolism and nutrition disorders</b>              | 1 (0.7)              | 1      | 1 (0.7)              | 1      | 1                            |
| <b>Psychiatric disorders</b>                           | 0                    | 0      | 1 (0.7)              | 1      | 1                            |
| <b>Respiratory, thoracic and mediastinal disorders</b> | 0                    | 0      | 1 (0.7)              | 1      | 1                            |
| <b>Renal and urinary disorders</b>                     | 1 (0.7)              | 1      | 0                    | 0      | 1                            |
| <b>Skin and subcutaneous tissue disorders</b>          | 2 (1.3)              | 2      | 3 (2.0)              | 3      | 1                            |
| <b>Surgical and medical procedures</b>                 | 3 (2.0)              | 3      | 5 (3.3)              | 6      | 0.501                        |

Some subjects developed more than one event throughout the study.
